# Supplementary material for: Transposase-assisted tagmentation of RNA/DNA hybrid duplexes
Source: eLife journal article supplement (doi:10.7554/elife.54919), 2020-07-23
Supplement: supp [file elife-54919-supp-v1.zip]

Archive with 11 entries (11 files):
- elife_poa_e54919_Transparent_Reporting_File.pdf
- elife_poa_e54919_Figure_1_figure_supplement_1.pdf
- elife_poa_e54919_Figure_2_figure_supplement_1.pdf
- elife_poa_e54919_Supplementary_file_1.xlsx
- elife_poa_e54919_Supplementary_file_2.xlsx
- elife_poa_e54919_Supplementary_file_3.xlsx
- elife_poa_e54919_Supplementary_file_4.xlsx
- elife_poa_e54919_Supplementary_file_5.xlsx
- elife_poa_e54919_Supplementary_file_6.xlsx
- elife_poa_e54919_Figure_1_source_data_1.xlsx
- elife_poa_e54919_Figure_2_source_data_1.xls
