# Supplementary material for: Transposase-assisted tagmentation of RNA/DNA hybrid duplexes
Source: eLife journal article supplement (doi:10.7554/elife.54919), 2020-07-23
Supplement: supp [file elife-54919-supp-v1.zip › elife_poa_e54919_Figure_1_source_data_1.xlsx]

## Sheet: Sheet1
Figure 1d — source data
Sample	Condition	Cq	Cq Mean	Cq Error
RT product	no Tn5	26.17	26.25	0.11
RT product	no Tn5	26.33	26.25	0.11
RT product	Tn5	18.04	18.06	0.03
RT product	Tn5	18.08	18.06	0.03
RT product	inactivated Tn5	26.41	26.41	0
RT product	inactivated Tn5	26.41	26.41	0
Figure 1e — source data
Sample	Condition	Cq	Cq Mean	Cq Error
RT product	no Tn5	30.25	30.38	0.26
RT product	no Tn5	30.22	30.38	0.26
RT product	no Tn5	30.68	30.38	0.26
RT product	Tn5 (without PEG200)	25.54	25.23	0.53
RT product	Tn5 (without PEG200)	25.52	25.23	0.53
RT product	Tn5 (without PEG200)	24.62	25.23	0.53
RT product	Tn5 (with PEG200)	21.9	21.94	0.05
RT product	Tn5 (with PEG200)	21.99	21.94	0.05
RT product	Tn5 (with PEG200)	21.93	21.94	0.05
gDNA	no Tn5	30.38	30.71	0.3
gDNA	no Tn5	30.97	30.71	0.3
gDNA	no Tn5	30.77	30.71	0.3
gDNA	Tn5 (without PEG200)	21.29	21.19	0.52
gDNA	Tn5 (without PEG200)	20.63	21.19	0.52
gDNA	Tn5 (without PEG200)	21.65	21.19	0.52
gDNA	Tn5 (with PEG200)	21.68	21.15	0.46
gDNA	Tn5 (with PEG200)	20.86	21.15	0.46
gDNA	Tn5 (with PEG200)	20.91	21.15	0.46
