# Supplementary material for: Transposase-assisted tagmentation of RNA/DNA hybrid duplexes
Source: eLife journal article supplement (doi:10.7554/elife.54919), 2020-07-23
Supplement: supp [file elife-54919-supp-v1.zip › elife_poa_e54919_Figure_2_source_data_1.xls]

## Sheet: all_read_distribution_sum
Sample	Gene feature	Tag count	Total tags	Percentage
NEBNext Ultra II RNA (10ng mRNA input)	CDS_Exons	63209913	86178895	73.3473
NEBNext Ultra II RNA (10ng mRNA input)	5_UTR_Exons	3477929	86178895	4.03571
NEBNext Ultra II RNA (10ng mRNA input)	3_UTR_Exons	13753700	86178895	15.9595
NEBNext Ultra II RNA (10ng mRNA input)	Introns	4528134	86178895	5.25434
NEBNext Ultra II RNA (10ng mRNA input)	TSS_up_1kb	209258	86178895	0.242818
NEBNext Ultra II RNA (10ng mRNA input)	TES_down_1kb	199161	86178895	0.231102
NEBNext Ultra II RNA (10ng mRNA input)	Other_intergenic	2167067	86178895	2.51461
TRACE-seq (random primer) (10ng mRNA input)	CDS_Exons	64367584	82000971	78.4961
TRACE-seq (random primer) (10ng mRNA input)	5_UTR_Exons	2349184	82000971	2.86482
TRACE-seq (random primer) (10ng mRNA input)	3_UTR_Exons	10399674	82000971	12.6824
TRACE-seq (random primer) (10ng mRNA input)	Introns	4005054	82000971	4.88415
TRACE-seq (random primer) (10ng mRNA input)	TSS_up_1kb	148609	82000971	0.181228
TRACE-seq (random primer) (10ng mRNA input)	TES_down_1kb	126314	82000971	0.15404
TRACE-seq (random primer) (10ng mRNA input)	Other_intergenic	1571517	82000971	1.91646
TRACE-seq (Oligo dT primer) (10ng mRNA input)	CDS_Exons	70148695	88543731	79.2249
TRACE-seq (Oligo dT primer) (10ng mRNA input)	5_UTR_Exons	2391115	88543731	2.70049
TRACE-seq (Oligo dT primer) (10ng mRNA input)	3_UTR_Exons	12454070	88543731	14.0654
TRACE-seq (Oligo dT primer) (10ng mRNA input)	Introns	2580755	88543731	2.91467
TRACE-seq (Oligo dT primer) (10ng mRNA input)	TSS_up_1kb	134584	88543731	0.151997
TRACE-seq (Oligo dT primer) (10ng mRNA input)	TES_down_1kb	104760	88543731	0.118314
TRACE-seq (Oligo dT primer) (10ng mRNA input)	Other_intergenic	1718546	88543731	1.9409
Smart-seq2 (20ng total RNA input)	CDS_Exons	46729680	70735025	66.063
Smart-seq2 (20ng total RNA input)	5_UTR_Exons	2231951	70735025	3.15537
Smart-seq2 (20ng total RNA input)	3_UTR_Exons	12730246	70735025	17.9971
Smart-seq2 (20ng total RNA input)	Introns	6412743	70735025	9.06587
Smart-seq2 (20ng total RNA input)	TSS_up_1kb	1200047	70735025	1.69654
Smart-seq2 (20ng total RNA input)	TES_down_1kb	167465	70735025	0.23675
Smart-seq2 (20ng total RNA input)	Other_intergenic	5043487	70735025	7.13011
Smart-seq2 (2ng total RNA input)	CDS_Exons	45314929	69331916	65.3594
Smart-seq2 (2ng total RNA input)	5_UTR_Exons	2119781	69331916	3.05744
Smart-seq2 (2ng total RNA input)	3_UTR_Exons	12467793	69331916	17.9828
Smart-seq2 (2ng total RNA input)	Introns	6590493	69331916	9.50571
Smart-seq2 (2ng total RNA input)	TSS_up_1kb	1370652	69331916	1.97694
Smart-seq2 (2ng total RNA input)	TES_down_1kb	169470	69331916	0.244433
Smart-seq2 (2ng total RNA input)	Other_intergenic	5453600	69331916	7.86593
TRACE-seq (20ng total RNA input)	CDS_Exons	49719175	70272155	70.7523
TRACE-seq (20ng total RNA input)	5_UTR_Exons	2206020	70272155	3.13925
TRACE-seq (20ng total RNA input)	3_UTR_Exons	11004480	70272155	15.6598
TRACE-seq (20ng total RNA input)	Introns	5751080	70272155	8.18401
TRACE-seq (20ng total RNA input)	TSS_up_1kb	482256	70272155	0.686269
TRACE-seq (20ng total RNA input)	TES_down_1kb	143734	70272155	0.204539
TRACE-seq (20ng total RNA input)	Other_intergenic	2851096	70272155	4.05722
TRACE-seq (2ng total RNA input)	CDS_Exons	38153016	56466472	67.5676
TRACE-seq (2ng total RNA input)	5_UTR_Exons	2506422	56466472	4.43878
TRACE-seq (2ng total RNA input)	3_UTR_Exons	6312114	56466472	11.1785
TRACE-seq (2ng total RNA input)	Introns	5905870	56466472	10.4591
TRACE-seq (2ng total RNA input)	TSS_up_1kb	2691966	56466472	4.76737
TRACE-seq (2ng total RNA input)	TES_down_1kb	114343	56466472	0.202497
TRACE-seq (2ng total RNA input)	Other_intergenic	6884735	56466472	12.1926
