# Supplementary material for: Transposase-assisted tagmentation of RNA/DNA hybrid duplexes
Source: eLife journal article supplement (doi:10.7554/elife.54919), 2020-07-23
Supplement: supp [file elife-54919-supp-v1.zip › elife_poa_e54919_Supplementary_file_1.xlsx]

## Sheet: Sheet1
Strand extension	Mapping ratio
Bst 3.0 DNA polymerase	0.767
SS IV reverse transcriptase	0.702
PCR	Mapping ratio
Q5 DNA polymerase	0.803
KAPA DNA polymerase	0.573
