# Supplementary material for: Transposase-assisted tagmentation of RNA/DNA hybrid duplexes
Source: eLife journal article supplement (doi:10.7554/elife.54919), 2020-07-23
Supplement: supp [file elife-54919-supp-v1.zip › elife_poa_e54919_Supplementary_file_2.xlsx]

## Sheet: Sheet1
Library type	Mapping rate	rRNA rate	Genes
NEB Ultra II RNA (10ng mRNA input) replicate 1	0.9689	0.0069	13522
NEB Ultra II RNA (10ng mRNA input) replicate 2	0.9694	0.007	13540
TRACE-seq (Oligo dT primer) (10ng mRNA input) replicate 1	0.9545	0.0009	12675
TRACE-seq (Oligo dT primer) (10ng mRNA input) replicate 2	0.9539	0.001	12566
TRACE-seq (Random primer) (10ng mRNA input) replicate 1	0.9044	0.0026	13557
TRACE-seq (Random primer) (10ng mRNA input) replicate 2	0.9136	0.0029	13597
TRACE-seq (200ng total RNA input) replicate 1	0.8551	0.093	13390
TRACE-seq (200ng total RNA input) replicate 2	0.8594	0.0875	13387
TRACE-seq (200ng total RNA input) replicate 3	0.8556	0.0901	13386
