# Supplementary material for: Transposase-assisted tagmentation of RNA/DNA hybrid duplexes
Source: eLife journal article supplement (doi:10.7554/elife.54919), 2020-07-23
Supplement: supp [file elife-54919-supp-v1.zip › elife_poa_e54919_Supplementary_file_3.xlsx]

## Sheet: Sheet1
Library type	Mapping rate	rRNA rate	Genes
Smart-seq2 (20ng total RNA input) replicate 1	0.9032	0.1026	12916
Smart-seq2 (20ng total RNA input) replicate 2	0.9119	0.0906	12948
TRACE-seq (20ng total RNA input) replicate 1	0.9096	0.0717	13353
TRACE-seq (20ng total RNA input) replicate 2	0.9212	0.0393	13264
Smart-seq2 (2ng total RNA input) replicate 1	0.9032	0.1125	12792
Smart-seq2 (2ng total RNA input) replicate 2	0.9059	0.1069	12761
TRACE-seq (2ng total RNA input) replicate 1	0.8413	0.2135	12806
TRACE-seq (2ng total RNA input) replicate 2	0.8361	0.199	12627
