# Supplementary material for: Transposase-assisted tagmentation of RNA/DNA hybrid duplexes
Source: eLife journal article supplement (doi:10.7554/elife.54919), 2020-07-23
Supplement: supp [file elife-54919-supp-v1.zip › elife_poa_e54919_Supplementary_file_4.xlsx]

## Sheet: 工作表1
	NEBNext kit ($)		TRACE-seq ($)		Smart-seq2 ($)
mRNA Purification	2.79	-	-	mRNA Purification	-
Library Praperation	45.42	RT: SS IV	2.75	RT: SS II	3.13
		-	-	Preamplification: KAPA	1.4
		-	-	Purification: XP beads	0.52
		Tagmentation: Tn5	5.43	Tagmentation & PCR: Nextera XT DNA sample preparation kit	24.07
		Strand extention: Bst 3.0	0.82
		PCR: Q5	1.8
		Superase-In RNase Inhibitor	1.88	-	-
Total	48.21		12.68		29.12
