# Supplementary material for: Transposase-assisted tagmentation of RNA/DNA hybrid duplexes
Source: eLife journal article supplement (doi:10.7554/elife.54919), 2020-07-23
Supplement: supp [file elife-54919-supp-v1.zip › elife_poa_e54919_Supplementary_file_5.xlsx]

## Sheet: Sheet1
Key Resources Table
Reagent type (species) or resource	Designation	Source or reference	Identifiers	Additional information
Cell line (Homo-sapiens)	HEK293T	American Type Culture Collection	Cat#: CRL-11268, RRID: CVCL_1926
Antibody	Mouse anti-DNA-RNA Hybrid [S9.6] Antibody	Kerafast	Cat#: ENH001, RRID: AB_2687463	1:2000
Antibody	Antibody Anti-mouse-IgG-HRP	CWBiotech	Cat#: CW0102, RRID: AB_2736997	1:3000
Recombinant DNA reagent	CLuc Control Template	NEB	Cat#：E2060S
Sequence-based reagent	CLuc Control_F	This paper	PCR primers	TAATACGACTCACTATAGGG
Sequence-based reagent	CLuc Control_R	This paper	PCR primers	TTAGCTTCACAGGAAGTTGG
Sequence-based reagent	GAPDH-qFWD	This paper	PCR primers	GCATCCTGGGCTACACTGAG
Sequence-based reagent	GAPDH-qRVS	This paper	PCR primers	AAAGTGGTCGTTGAGGGCAA
Sequence-based reagent	ACTB-qFWD	This paper	PCR primers	AGTCATTCCAAATATGAGATGCGTT
Sequence-based reagent	ACTB-qRVS	This paper	PCR primers	TGCTATCACCTCCCCTGTGT
Sequence-based reagent	CYC1-qFWD	This paper	PCR primers	CACCATAAAGCGGCACAAGT
Sequence-based reagent	CYC1-qRVS	This paper	PCR primers	CAGGATGGCAAGCAGACACT
Sequence-based reagent	Tn5ME-A	doi: 10.1186/gb-2010-11-12-r119)	Transposon adaptor oligonucleotides	TCGTCGGCAGCGTCAGATGTGTATAAGAGACAG
Sequence-based reagent	Tn5ME-B	doi: 10.1186/gb-2010-11-12-r119)	Transposon adaptor oligonucleotides	GTCTCGTGGGCTCGGAGATGTGTATAAGAGACAG
Sequence-based reagent	Tn5MErev	doi: 10.1186/gb-2010-11-12-r119)	Transposon adaptor oligonucleotides	CTGTCTCTTATACACATCT
Sequence-based reagent	Tn5_qFWD	This paper	PCR primers	AATGATACGGCGACCACCGAGATCTACACTCGTCGGCAGCGTC
Sequence-based reagent	Tn5_qRVS	This paper	PCR primers	CAAGCAGAAGACGGCATACGAGATGTCTCGTGGGCTCGG
Sequence-based reagent	TSO	doi:10.1038/nprot.2014.006	Template switch primer	AAGCAGTGGTATCAACGCAGAGTACATrGrG+G
Sequence-based reagent	ISPCR oligo	doi:10.1038/nprot.2014.006	PCR primers	AAGCAGTGGTATCAACGCAGAGT
Sequence-based reagent	oligo dT(23)VN primer	NEB	Cat#：S1327S
Sequence-based reagent	Random primer mix	NEB	Cat#：S1330S
Sequence-based reagent	N501 primer	Illumina	PCR primers for sequencing
Sequence-based reagent	N701-N712 primers	Illumina	PCR primers for sequencing
commercial assay or kit	TRIzol	Invitrogen	Cat#: 15596018
commercial assay or kit	Blood & Cell Culture DNA Midi Kit	Qiagen	Cat#：13343
commercial assay or kit	MAXIscript T7 Transcription Kit	Invitrogen	Cat#：AM1314M
commercial assay or kit	SUPERase-In RNase Inhibitor	Invitrogen	Cat#：AM2696
commercial assay or kit	Quant-iT™ PicoGreen™ dsDNA Assay Kit	Invitrogen	Cat#：P11496
commercial assay or kit	AceQ Universal SYBR qPCR Master Mix	Vazyme	Cat#：Q511-02
commercial assay or kit	pEASY-Blunt Zero Cloning Kit	TransGen	Cat#：CB501-01
commercial assay or kit	NEBNext Q5 Hot Start HiFi PCR Master Mix	NEB	Cat#：M0544
commercial assay or kit	Agencourt AMPure XP beads	Beckman Coulter	Cat#：A63882
commercial assay or kit	RNAClean XP beads	Beckman Coulter	Cat#：A63987
commercial assay or kit	Qubit dsDNA HS Assay kit	Invitrogen	Cat#：Q33230
commercial assay or kit	DNF-474 High Sensitivity NGS Fragment Analysis Kit	Agilent	Cat#：DNF-473-1000
commercial assay or kit	NEBNext Ultra II RNA Library Prep Kit for Illumina	NEB	Cat#：E7770S
commercial assay or kit	Dynabeads Oligo(dT)25	Invitrogen	Cat#: 61005
commercial assay or kit	KAPA HiFi HotStart ReadyMix	KAPA Biosystems	Cat#: KK2601
commercial assay or kit	TransDetect® PCR Mycoplasma Detection Kit	TransGen	Cat#: FM311-01
commercial assay or kit	RNA 6000 Pico kits (Agilent Technologies	Agilent	Cat#: 5067-1513
peptide, recombinant protein	DNase I	NEB	Cat#: M0303S
peptide, recombinant protein	SuperScript IV reverse transcriptase	Invitrogen	Cat#: 12594100
peptide, recombinant protein	SuperScript II reverse transcriptase	Invitrogen	Cat#: 18064022
peptide, recombinant protein	RNase H	NEB	Cat#：M0297
peptide, recombinant protein	TruePrep Tagment Enzyme	Vazyme	Cat#：S601-01
peptide, recombinant protein	Bst 3.0 DNA Polymerase	NEB	Cat#：M0374S
chemical compound, drug	PEG200	Sigma	Cat#：88440
chemical compound, drug	PEG8000	Sigma	Cat#：89510
software, algorithm	Trim Galore	http://www.bioinformatics.babraham.ac.uk/projects/trim_galore/	RRID：SCR_011847	v0.6.4_dev
software, algorithm	STAR	PMID: 23104886	RRID: SCR_015899	v2.7.1a
software, algorithm	bowtie2	https://doi.org/10.1038/nmeth.1923	RRID: SCR_005476	v2.2.9
software, algorithm	Samtools	http://samtools.sourceforge.net/	RRID: SCR_002105	v1.9
software, algorithm	cuffnorm	PMID: 20436464	RRID: SCR_014597	v2.2.1
software, algorithm	QoRTs	https://doi.org/10.1186/s12859-015-0670-5	RRID:SCR_018665	v1.1.6
software, algorithm	RseQC	PMID: 22743226	RRID: SCR_005275	v2.6.4
software, algorithm	Picard Tools	http://broadinstitute.github.io/picard/	RRID: SCR_006525	v2.20.6
software, algorithm	Preseq	PMID: 23435259	RRID:SCR_018664	v2.0.0
software, algorithm	RStudio	https://rstudio.com/	RRID: SCR_000432	1.2.5033
software, algorithm	Integrative Genomics Viewer	http://software.broadinstitute.org/software/igv/	RRID: SCR_011793	v2.4.16
