# Supplementary figures and images for: Transposase-assisted tagmentation of RNA/DNA hybrid duplexes
Source: eLife journal article supplement (doi:10.7554/elife.54919), 2020-07-23

# Figure 1— figure supplement 1

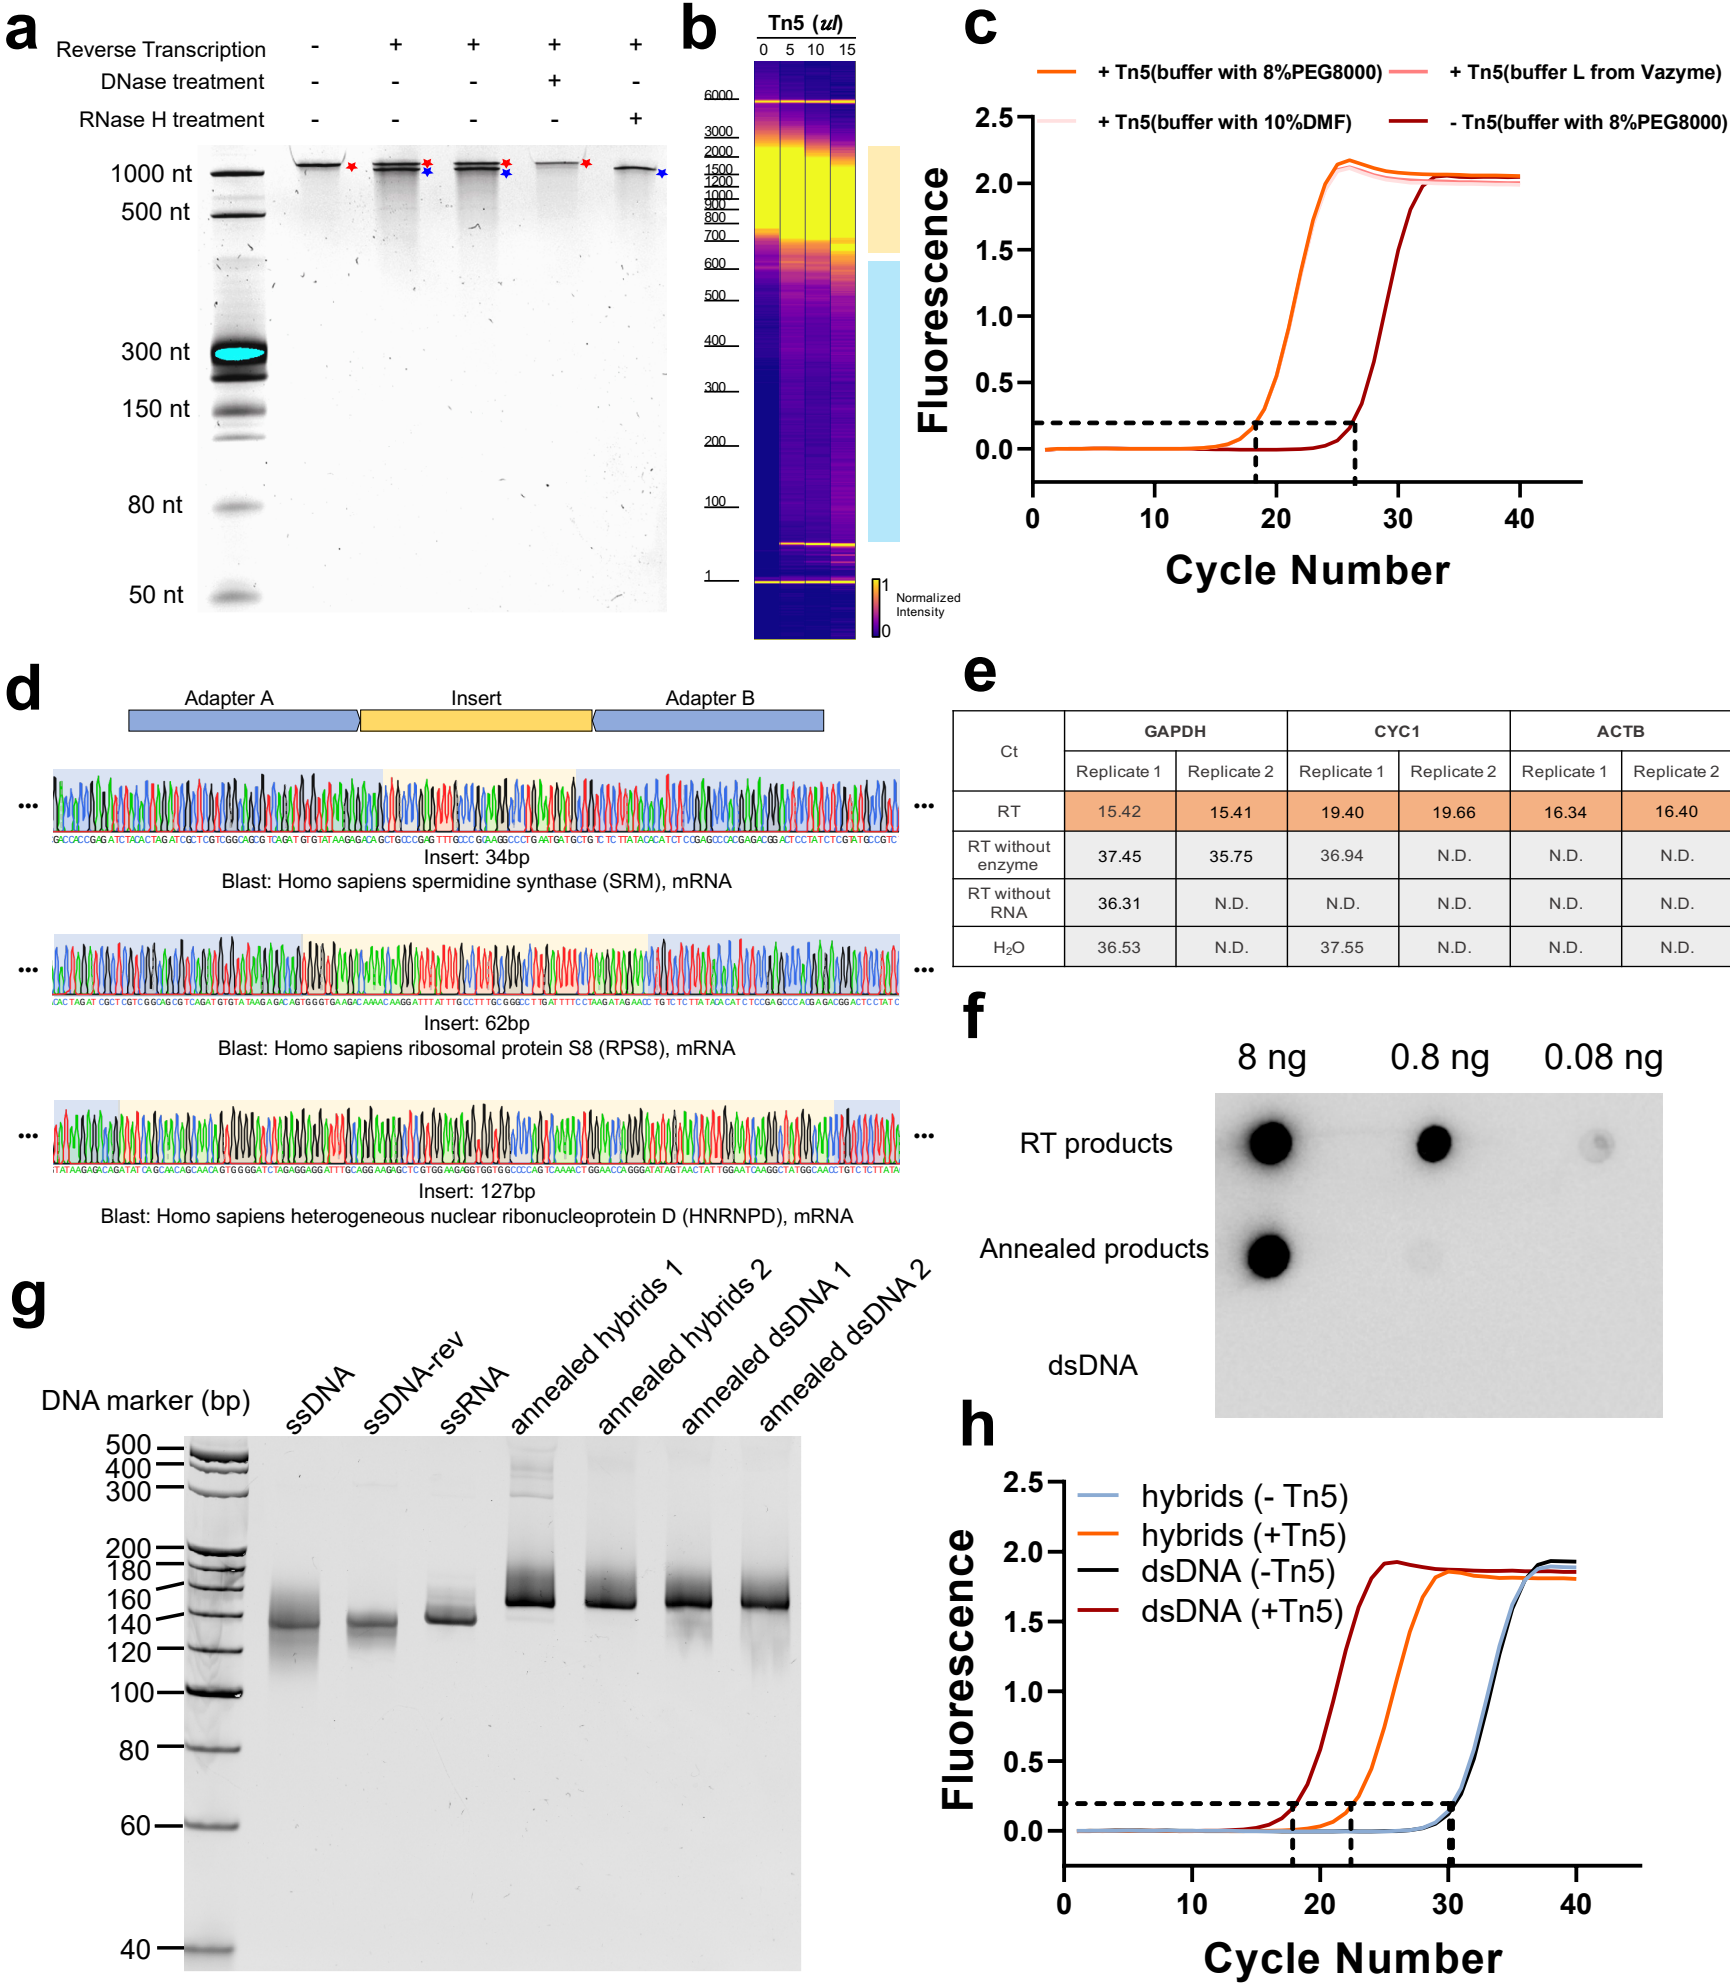

Supplement: supp [file elife-54919-supp-v1.zip › elife_poa_e54919_Figure_1_figure_supplement_1.pdf]

# Figure 2-figure supplement 1

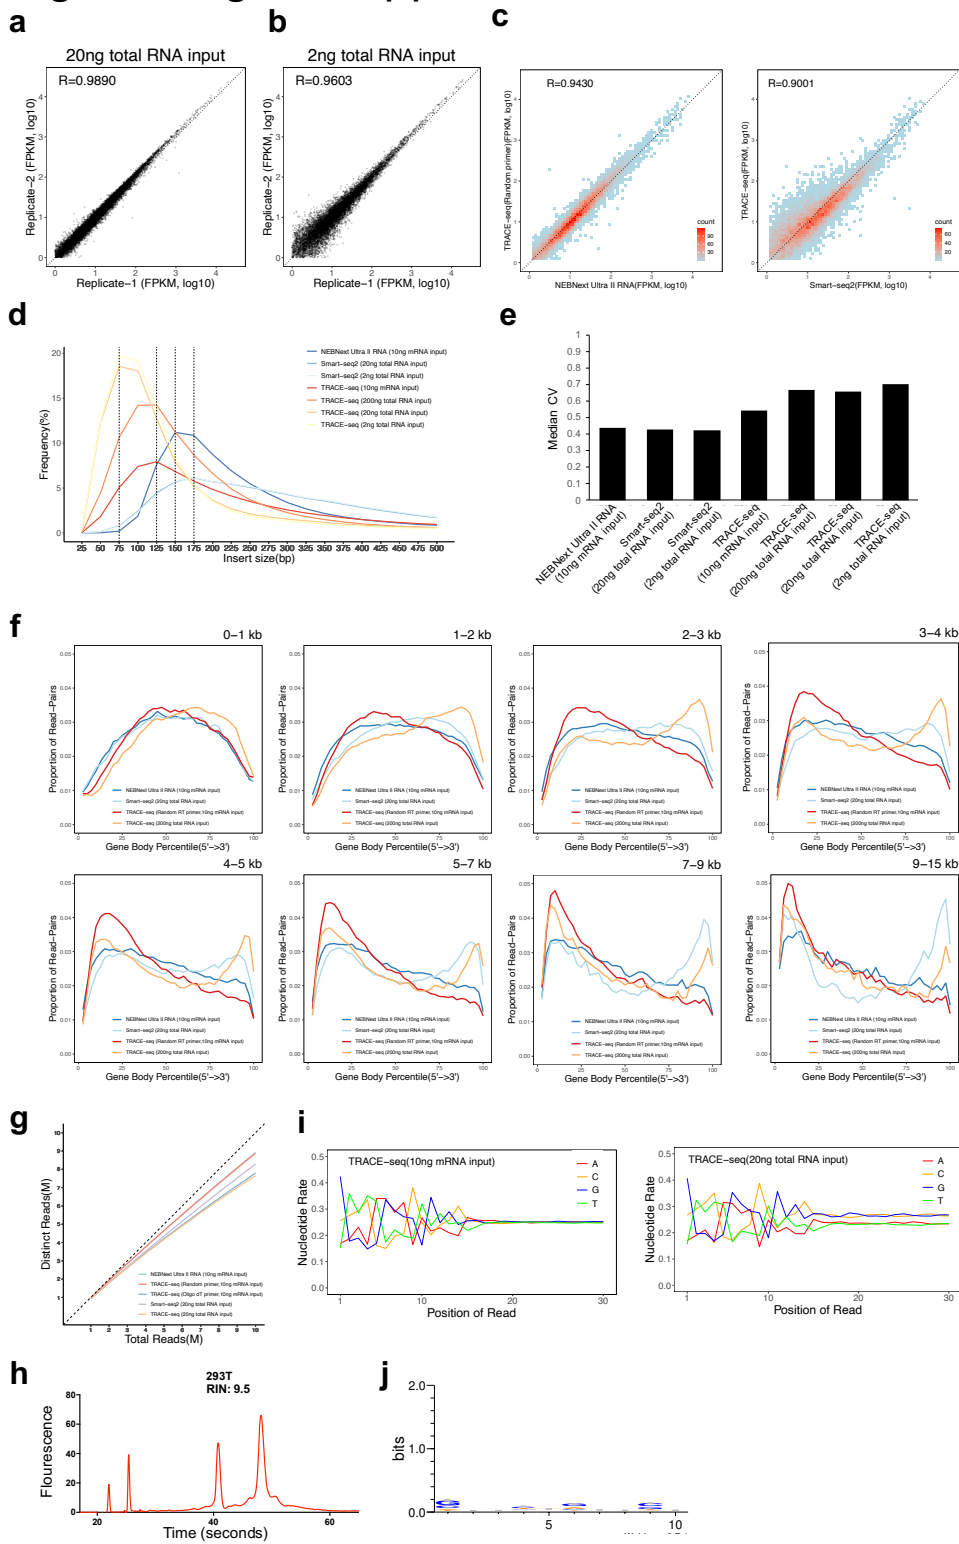

Supplement: supp [file elife-54919-supp-v1.zip › elife_poa_e54919_Figure_2_figure_supplement_1.pdf]
